# Supplementary material for: HPF1-dependent PARP activation promotes LIG3-XRCC1-mediated backup pathway of Okazaki fragment ligation
Source: bioRxiv or medRxiv preprint supplement (doi:10.1101/2020.10.21.348292), 2020-10-21
Supplement: Supplementary file [file media-1.pdf]

## SUPPLEMENTARY DATA

### **HPF1-dependent PARP activation promotes LIG3-XRCC1-mediated backup pathway of Okazaki fragment ligation**

Soichiro Kumamoto<sup>1</sup>, Atsuya Nishiyama<sup>1\*</sup>, Yoshie Chiba<sup>1</sup>, Ryota Miyashita<sup>1</sup>, Chieko Konishi<sup>1</sup>, Yoshiaki Azuma<sup>2</sup> and Makoto Nakanishi<sup>1\*</sup>

<sup>1</sup> Division of Cancer Cell Biology, The Institute of Medical Science, The University of Tokyo, 4-6-1 Shirokanedai, Minato-ku, Tokyo 108-8639, Japan

<sup>2</sup> Department of Molecular Biosciences, University of Kansas, Lawrence, Kansas, 66045, U.S.A.

\* To whom correspondence should be addressed. Tel: 81-3-5449-5341; Fax: 81-3-5449-5342; Email: mkt-naka@g.ecc.u-tokyo.ac.jp

Correspondence may also be addressed to Atsuya Nishiyama. Tel: 81-3-5449-5731; Fax: 81-3-5449-5342; Email: uanishiyama@g.ecc.u-tokyo.ac.jp

**Figure S1**

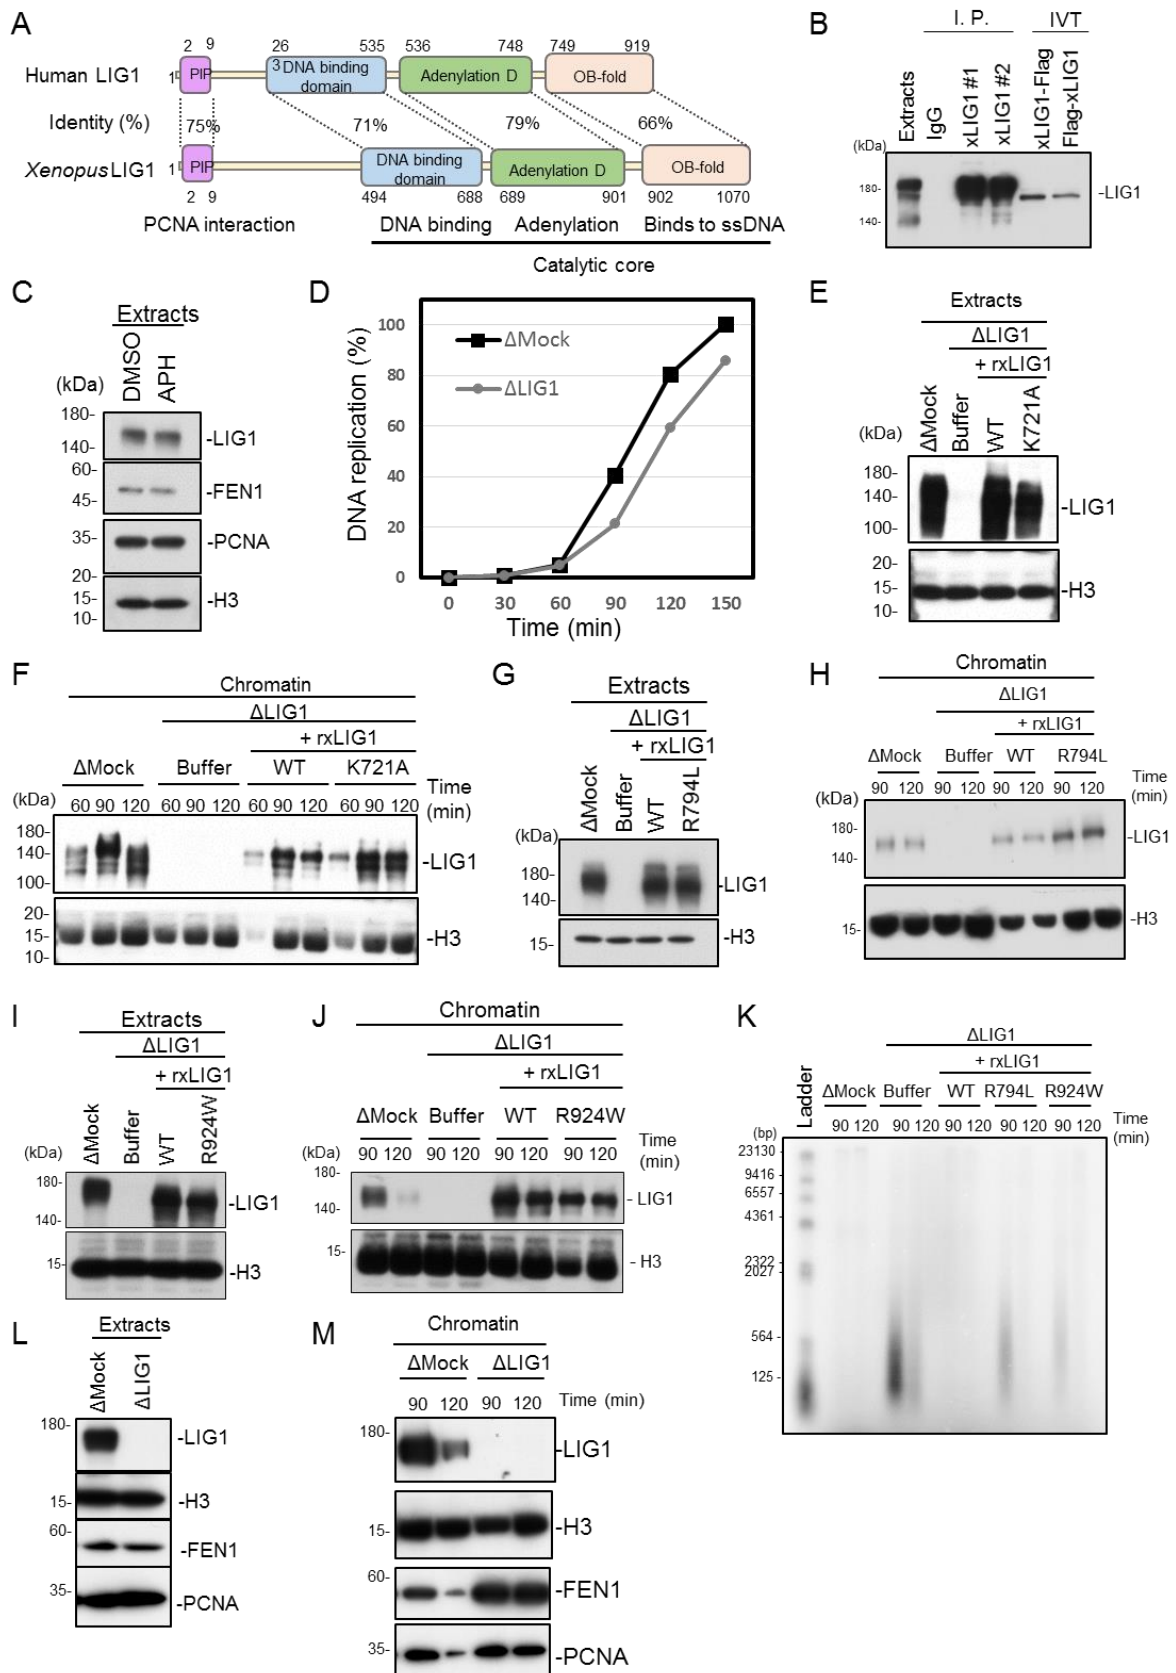

Supplementary Figure 1. (A) Domain structures of *Xenopus* and Human LIG1. LIG1 is composed of a PCNA-interacting protein (PIP) motif, a DNA binding domain, an adenylation domain and an oligonucleotide/oligosaccharide-binding (OB)-fold domain that are well conserved in humans and *Xenopus*. (B) Immunoblot analysis of egg extracts, LIG1 immunoprecipitates and reticulocyte lysates translating recombinant FLAG-tagged xLIG1. (C) Immunoblot of extracts used in Figure 1D using the indicated antibodies. (D) DNA replication in xLIG1- and mock-depleted extracts. The relative amounts of DNA synthesis are shown. (E) LIG1-depleted extracts were supplemented with wild-type xLIG1 or xLIG1-K721A and analyzed by immunoblotting using the indicated antibodies. (F) The extracts from (E) were used to replicate sperm nuclei. Chromatin-bound proteins were analyzed by immunoblotting. (G) LIG1-depleted extracts were supplemented with wild-type xLIG1 or xLIG1-R794L and analyzed by immunoblotting using the indicated antibodies. (H) The extracts from (G) were used to replicate sperm nuclei. Chromatin-bound proteins were analyzed by immunoblotting. (I) LIG1-depleted extracts were supplemented with wild-type xLIG1-3xFlag or xLIG1-K924W-3xFlag and analyzed by immunoblotting using the indicated antibodies. (J) The extracts from (G) were used to replicate sperm nuclei. Chromatin-bound proteins were analyzed by immunoblotting. (K) xLIG1-depleted extracts were supplemented with wild-type xLIG1-3xFlag, xLIG1-R794L-3xFlag or xLIG1-R924W-3xFlag. Purified genomic DNA from chromatin was labeled using exonuclease-deficient Klenow fragment and  $\alpha$ -<sup>32</sup>P dCTP and separated in a denaturing agarose gel. (L) Mock- and xLIG1-depleted extracts were analyzed by immunoblotting using the indicated antibodies. (M) The extracts from (L) were used to replicate sperm nuclei. Chromatin-bound proteins were analyzed by immunoblotting.

**Figure S2**

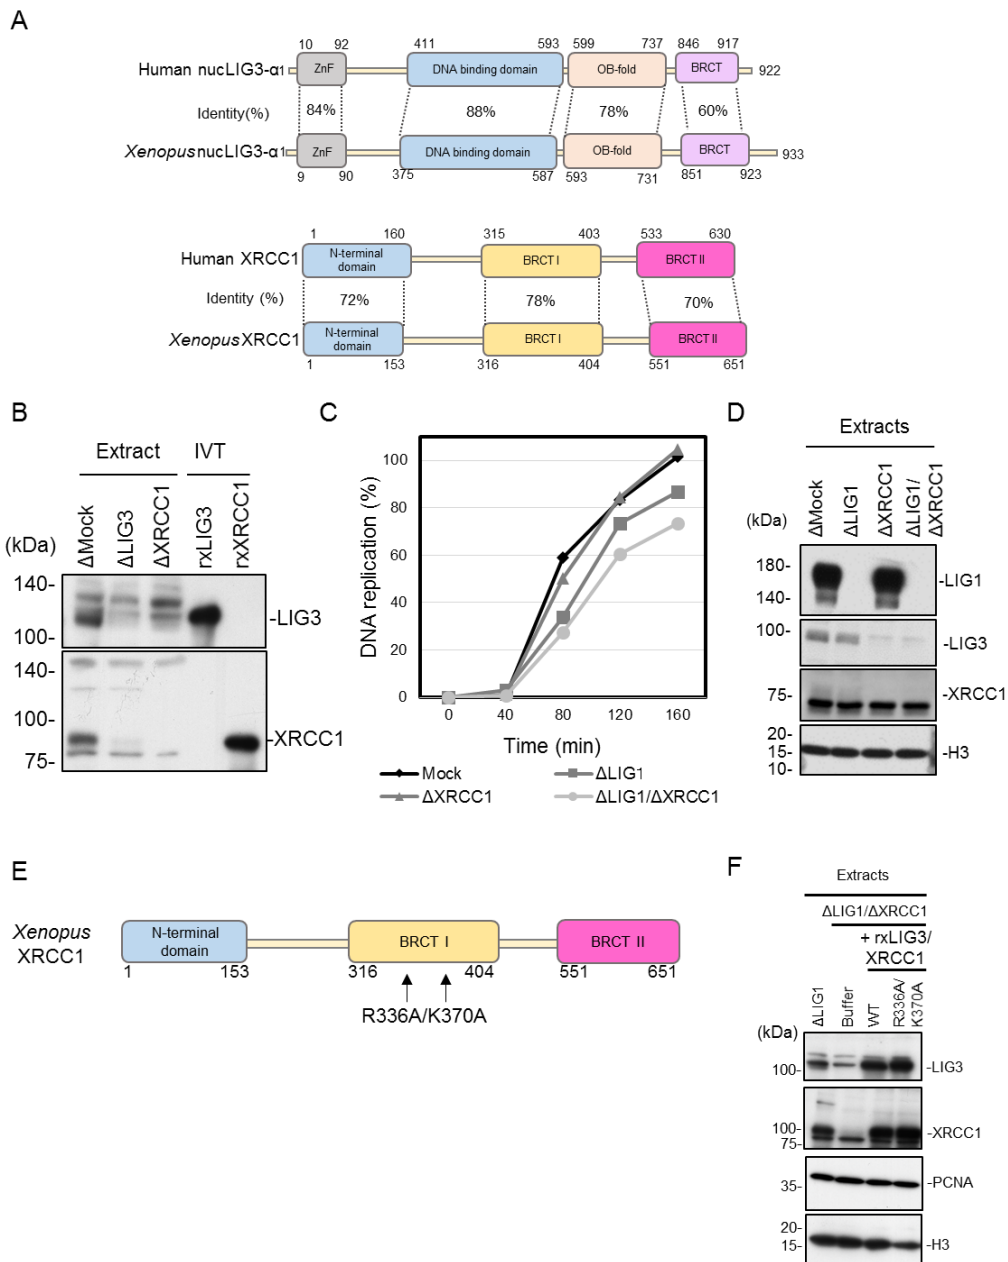

Supplementary Figure 2. (A) Domain structures of *Xenopus* and Human nuclear LIG3 and XRCC1. Nuclear LIG3 is composed of a zinc-finger (ZnF), DNA binding, oligonucleotide/oligosaccharide-binding (OB)-fold and BRCA1 C-Terminal (BRCT) domains that are well conserved in humans and *Xenopus*. XRCC1 is composed of an N-terminal domain, and BRCT I and BRCT II domains that are well conserved in humans and *Xenopus*. (B) Immunodepletion efficiency of xLIG3 and xXRCC1 from *Xenopus* egg extract. IVT; in vitro translation protein. Depleted extracts and IVT proteins were analyzed by immunoblotting using the indicated antibodies. (C) DNA replication in xLIG1-, xXRCC1-, xLIG1/xXRCC1-, and mock-depleted extracts. The relative amounts of DNA synthesis are shown. (D) Immunoblot of the extracts of Figure 2C using the indicated antibodies. (E) Sequences of the wild-type and R336A/K370A mutant BRCT I domain in xXRCC1 are shown. (F) Immunoblot of the extracts of Figure 2D using the indicated antibodies.

**Figure S3**

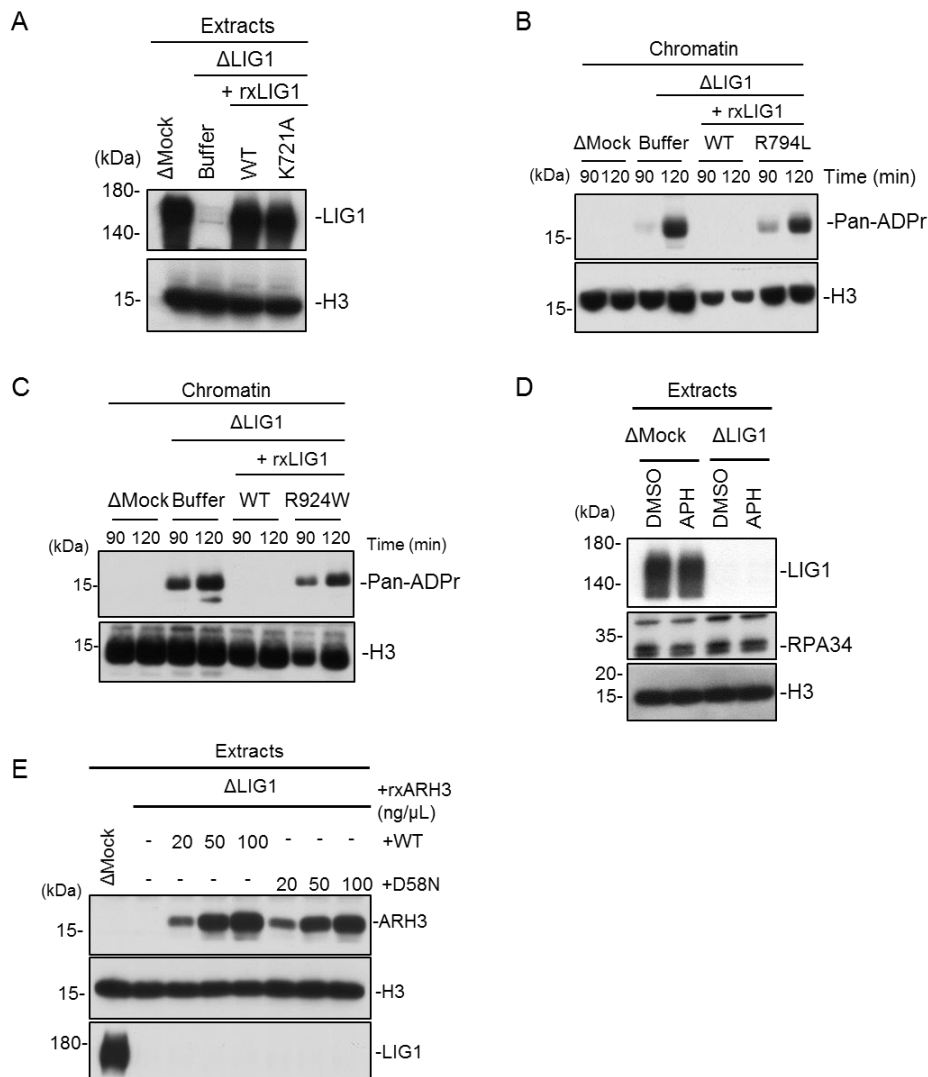

Supplementary Figure 3. (A) Immunoblot of extracts used in Figure 3A using the indicated antibodies. (B) xLIG1-depleted extracts were supplemented with either buffer or wild-type xLIG1-3xFlag or xLIG1-3xFlag-R794L. Chromatin-bound proteins were analyzed by immunoblotting using pan ADP-ribose detecting reagent. (C) xLIG1-depleted extracts were supplemented with either buffer or wild-type xLIG1-3xFlag or xLIG1-3xFlag-R924W. Chromatin-bound proteins were analyzed by immunoblotting using pan ADP-ribose detecting reagent. (D) Immunoblot of the extracts of Figure 3D using the indicated antibodies. (E) Immunoblot of the extracts of Figure 3E using the indicated antibodies..

**Figure S4**

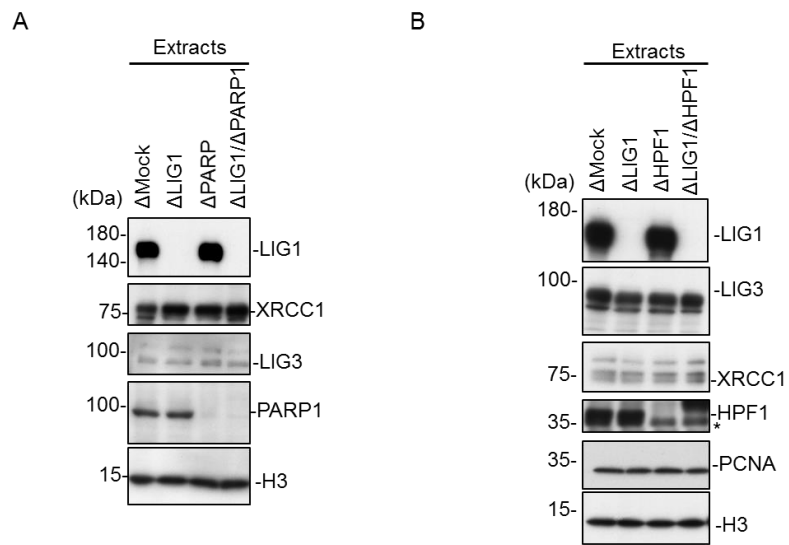

Supplementary Figure 4. (A) Immunoblot of the extracts of Figure 5A using the indicated antibodies. (B) Immunoblot of the extracts of Figure 5B using the indicated antibodies. The asterisk indicates a non-specific band.

**Table S1**

Supplementary Table 1

| No. | Sequence 5' -3'                         | Description                |
|-----|-----------------------------------------|----------------------------|
| 1   | GAAACCTTCATTTTACGGCGGGGA                | xLIG1 amplification        |
| 2   | ACTCCAAGGCAACACAATAGGTGG                | xLIG1 amplification        |
| 3   | GGCGCGGATCAGATCTCATGCAACGAACAATAAAGTC   | pVL139-xLIG1-Flag3         |
| 4   | GGGCCCTCTAGAATTCTACTTGTTATCGTCATCCT     | pVL139-xLIG1-Flag3         |
| 5   | GCATATGACGGGGAGCGTGCACAGATAC            | xLig1K721A mutation        |
| 6   | GTATTCACAAGTAAAGGCAGCTTCA               | xLig1K721A mutation        |
| 7   | GCTGCTCAGCCCAAGCTAGGGGCTGAAGTAA         | xLig1F8AF9A mutation       |
| 8   | GGACTTTATTGTTCTGTTGCATGAGA              | xLig1F8AF9A mutation       |
| 9   | CTAAAGAGAAAGGATGTGGATGCATCAG            | xLig1R794L mutation        |
| 10  | AGTAGTCAGTACTTGAAATGGCTGA               | xLig1K794L mutation        |
| 11  | TGGACTGGTATCTATGGAGGCTTCTTAC            | xLig1R924W mutation        |
| 12  | TTTCCCTTTCCCAAGGTAAGCTCCA               | xLig1R924W mutation        |
| 13  | GAGTGGGCTTTCTCTGTGTTGTTG                | xFEN1 amplification        |
| 14  | GACATATTGTCAAAGCCTTAGCGC                | xFEN1 amplification        |
| 15  | TGTGTGAGTGAGGGAAATTGCAGG                | xLIG3 amplification        |
| 16  | GTTGATCTGTGATGCCTTCTCCTG                | xLIG3 amplification        |
| 17  | GGGCCCTCTAGAATTTTACACACAATTCTCATCAACAC  | pVL139-xLIG3-Flag3         |
| 18  | GGTGGTGTGAAGCAGAAATCTGCT                | xXRCC1 amplification       |
| 19  | CTTTGCACTGGCAACATCCAGTTC                | xXRCC1 amplification       |
| 20  | GGCGCGGATCAGATCTCATGCCTGTGATCAAAGTGAAGC | pVL139-xXRCC1-Flag3        |
| 21  | GGGCCCTCTAGAATTCGCCTTGGGCACCACAACGTAAGG | pVL139-xXRCC1-Flag3        |
| 22  | GCAGCCGACCTCCGTGATAAAGCATTAG            | xXRCC1R336A mutation       |
| 23  | GAATGGATTCTGAAAGCCGCTCAGC               | xXRCC1R336A mutation       |
| 24  | GCATTCAGCCAGGTGAAAGCAGCGGGCG            | xXRCC1R370A mutation       |
| 25  | AGGGGTATTTGCAAAGGCACATATG               | xXRCC1R370A mutation       |
| 26  | CACGTTGTTACTGTAAGAGCCAGTGTGTTCCCTGT     | xPARP1 amplification       |
| 27  | CACTCCGTGATCCATCCTGCCAACGTATG           | xPARP1 amplification       |
| 28  | AGCGGAAACTCCACTCTTGTTGA                 | xPARG amplification        |
| 29  | GCTGGACATGAGTCAGGACTTCAT                | xPARG amplification        |
| 30  | TTCTCAGAGAGTGCTGCTATTCGC                | xHPF1 amplification        |
| 31  | AAGCCATCTTCCCTCTGAAGTGAC                | xHPF1 amplification        |
| 32  | GCTGCGGAGCTTCCAGAGACAGATGGAAACC         | xHPF1Y251AR252<br>mutation |
| 33  | CCCAACATCATTCTTATCCACTGGC               | xHPF1Y251AR252<br>mutation |
| 34  | TTCTCAGAGAGTGCTGCTATTCGC                | xARH3 amplification        |
| 35  | AAGCCATCTTCCCTCTGAAGTGAC                | xARH3 amplification        |
| 36  | TGTATATGTTAAAACACTCTTTAGT               | xARH3D58N mutation         |
| 37  | AATGACACAGCCATGGCAAGGTCGATTG            | xARH3D58N mutation         |
